# Supplementary material
Source: PubMed Central journal article supplement (PMC2830139)
Supplement: fj.09-142976_1.pdf [file fj.09-142976_1.pdf]

## Supplementary figure/table and legends

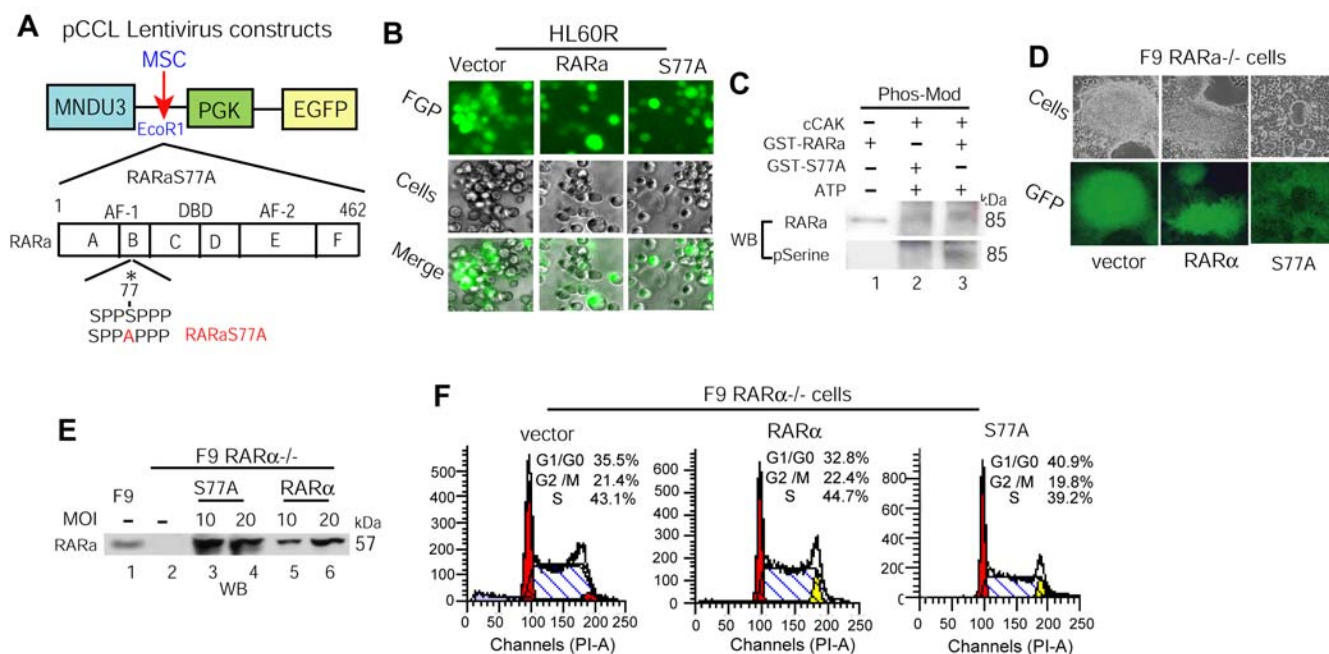

Supplementary Figure 1

| Genes                | Primers                                                    | Fragment (bp) | Location* | Accession # |
|----------------------|------------------------------------------------------------|---------------|-----------|-------------|
| mRAR $\beta$         | 5'-aatcctgggagttggtgatg- 3'<br>5'-cggagcagctcacttcttac- 3' | 145           | 7-152     | X56573      |
| hRAR $\beta$         | 5'-aatcctgggagttggtgatg- 3'<br>5'-gaagtgagctgttcagaggc- 3' | 149           | 730-879   | X56849      |
| hp21 <sup>CIP1</sup> | 5'-gcaaattgttcaggcacaga- 3'<br>5'-ccctcatttcagatggttt- 3'  | 178           | 3343-3521 | U24170      |

\* Sequence location 1 refers to the first base pair of the published sequence in National Cancer for Biotechnology Information (NCBI) database.

Supplementary Table 1

**The legends of the supplementary figure/table**

**S-Fig. 1. RAR $\alpha$ S77A resists phosphorylation by CAK and decreased RAR $\alpha$ S77 phosphorylation is a downstream event of decreased CAK activity.** **A**, RAR $\alpha$ S77A (S77A) or RAR $\alpha$  cDNA was cloned into the lentiviral vector. **B**, Transduction efficiency of S77A and RAR $\alpha$  in HL60R cells was > 90%. **C**, CAK complexes immunoprecipitated from F9 cells were incubated with GST-RAR $\alpha$  or GST-S77A in an *in vitro* kinase reaction in the presence of unlabeled ATP. The reaction mixtures were then subjected to WB analysis using anti-RAR $\alpha$  and anti-serine antibodies as indicated. **D**, Transduction efficiency of S77A or RAR $\alpha$  in F9 RAR $\alpha$ <sup>-/-</sup> cells was > 90%. **E**, WB depiction of S77A and RAR $\alpha$  levels in transduced F9 RAR $\alpha$ <sup>-/-</sup> cells by using anti-RAR $\alpha$  antibodies. **F**, FACS analysis of cell cycle profile of F9 RAR $\alpha$ <sup>-/-</sup> cells expressing S77A or RAR $\alpha$ .

**S-Table 1.** Primers used for PCR amplification in ChIP assays.
